# Supplementary material
Source: publisher site journal article supplement (https://www.degruyterbrill.com/publication/dbid/voss/downloadAsset/VOSS_VOSS_Joachim%20Zeller--de.pdf)
Supplement: Supplementary file 1 [file VOSS_VOSS_Joachim%20Zeller--de.pdf]

Joachim Zeller

## Die Vossische Zeitung 1617 bis 1934

### Das Ende einer Ära

Als die Vossische Zeitung 1934 wegen der zunehmenden Zensur und des Berufsverbots für jüdische Redakteure ihr Erscheinen einstellte, endete damit eine Ära in der Geschichte der deutschen Presse. Kein anderes Blatt ist über einen so langen Zeitraum durchgängig erschienen, kein anderes wurde international so wahrgenommen. Entsprechend wurde die Nachricht von der Einstellung der *Vossischen Zeitung* als historischer Einschnitt empfunden. Bereits am Sonnabend, dem 24. März 1934 teilte der Verlag Ullstein mit: „... Die Aufgabe eines Blattes vom Stil der Vossischen Zeitung ist nach unserer Ansicht beendet. So haben wir denn aus freien Stücken den schmerzlichen aber folgerichtigen Entschluß gefasst, die Vossische Zeitung wieder aufzugeben und sie nach Ende dieses Monats nicht mehr erscheinen zu lassen.“<sup>1</sup> Sieben Tage später, am 31. März 1934, verabschiedete sich Erich Welter<sup>2</sup> als letzter Chefredakteur von den Lesern: „Die Geschichte einer Zeitung, ... findet mit dem heutigen Tag einen Abschluß. [...] Bei dieser Lage der Dinge bedauern wir es mit unseren Lesern außerordentlich, dass der alte Rahmen zerbricht, in dem wir jetzt wirkten und mit Zehntausenden täglich Fühlung hatten. Wir bedauern insbesondere, dass die Gruppe von Menschen, die sich um die Vossische Zeitung zusammenfand, zunächst Gefahr läuft, versprengt zu werden. [...] Die Zeit der Zeitung, wie wir sie sehen, ist nicht vorbei, auch wenn wir durch die Einstellung des Blattes gezwungen werden, uns heute von unseren Lesern, die uns treugeblieben sind, zu verabschieden.“<sup>3</sup> Deutlicher und direkter drückte es Georg Bernhard aus seinem französischen Exil im *Pariser Tageblatt* vom 21. März 1934 unter der Schlagzeile: „Die Voss stirbt“ aus „Eine Trauernachricht für die deutsche Kultur. An dem Tage, an dem die ‚Vossische Zeitung‘, endgültig zu leben aufhören wird, verschwindet nicht bloss eines der ältesten Presseorgane Deutschlands, sondern das Blatt, dessen Tradition – angefangen von Gotthold Ephraim Lessings Redakteurtätigkeit über Theodor Fontane bis zu Remarque – mit allen Wandlungen und Schwingungen der deutschen Literatur und den Ausstrahlungen deutscher Wissenschaft und deutscher Gesittung auf das engste verbunden war. In der politischen Geschichte der ‚Vossischen Zeitung‘, hat es gewiss Schwankungen und Abirrungen gegeben. Aber der Kampf, den sie bis zum Jahr

---

1 Vossische Zeitung Nr. 71, 24. März 1934, Titelseite.

2 Erich Welter (\* 30. Juni 1900 in Straßburg; † 10. Juni 1982 in Frankfurt am Main), deutscher Publizist und Wirtschaftswissenschaftler, von der *Frankfurter Zeitung* 1932 zur *Vossischen* gekommen, danach bis 1943 wieder als Wirtschaftsredakteur bei der *Frankfurter*, und im November 1949 einer der Gründer und Herausgeber der *Frankfurter Allgemeinen Zeitung*.

3 Abschied vom Leser, EW [d. i.: Erich Welter], Vossische Zeitung Nr. 77; Sonnabend, 31. März 1934

1931 für die politische Freiheit und Demokratie führte, füllt eine ganze Reihe rühmlicher Kapitel im Buche der deutschen Geschichte.“<sup>4</sup>

## Die „Vossische“ – Geschichte eines Zeitungsnamens

Noch im Kopf der zitierten letzten Ausgabe der Vossischen Zeitung steht als Untertitel: „Berlinische Zeitung von Staats- und gelehrten Sachen / Gegründet 1704“ – und 1904 wurde mit einem großen Festakt und der Festschrift von Arend Buchholtz das 200-jährige Jubiläum gefeiert.<sup>5</sup> Tatsächlich hatte am 28. August 1704 König Friedrich I. dem Buchdrucker Johann Lorentz die königliche Bestätigung für das von ihm erworbene Berliner Zeitungs-Privileg erteilt. Er erwarb dieses mitsamt der Druckerei von Christoff Runge Witwe Maria Katharina. Christoff Runge wiederum war Sohn und Geschäftsnachfolger von Georg Runge, dem Drucker der Botenmeisterzeitungen seit 1626. Es gehörte zu den Pflichten der Botenmeister, das heißt der Kurfürstlichen Postmeister, Nachrichten aus dem ganzen Reich zu besorgen und diese in wöchentlich erscheinender Zeitungsform zu verbreiten. Überliefert sind uns die *Avisen* und *Berliner Botenmeister Zeitung* von Christoff Frischmann aus den Jahren 1617 und 1618. Nach seinem Tod folgte ihm sein Bruder Veit Frischmann als Botenmeister nach, der 1655 die Herausgabe der Zeitung an den bisherigen Drucker Runge übergab. Runge Witwe verkaufte im August 1704 ihre Druckerei an Johann Lorentz, der dann das Berliner Zeitungs-Privileg erhielt, welches seitens des Verlages bis in das zwanzigste Jahrhundert fälschlich als das Gründungsdatum angesehen wurde.

Doch schon 1721 wurde es unter dem Soldatenkönig Friedrich Wilhelm I. Johann Lorentz verboten, die *Berlinischen Ordinairen Zeitungen* zu drucken. Alleinverleger der *Berlinischen Privilegierten Zeitung* wurde nun Johann Andreas Rüdiger, der für seinen Titel die Zählung des Vorgängers übernahm und fortsetzte. Nach Rüdigers Tod 1751 setzte sein Schwiegersohn, der Buchhändler Christian Friedrich Voss mit dem Erbe des Privilegs die Zeitung fort und somit wurde er gewissermaßen zum Stammvater der *Vossischen Zeitung*, die jedoch bis 1775 als *Berlinisch-privilegierte Staats- und Gelehrte Zeitung*, von da an als *Königlich privilegierte Berlinische Zeitung von Staats- und gelehrten Sachen* erschien und lediglich den Editionsvermerk: „Im Verlage Vossischer Erben“ enthielt – von ihren Lesern jedoch schon im 18. Jahrhundert „Tante Voss“ genannt.

Somit kann – wenn auch auf verschlungenen Wegen – die Edition der *Vossischen Zeitung* bis zu den Berliner Botenmeister Zeitungen von 1617/1618 zurückverfolgt werden. Doch erst ab Oktober 1910 wurde *Vossische Zeitung* der Haupttitel und die *Königlich privilegierte Berlinische Zeitung* wurde auf den Untertitel verdrängt.

<sup>4</sup> Pariser Tageblatt, 2. Jg., 1934; Ausg. 99; 21. März, Titelseite.

<sup>5</sup> Die Vossische Zeitung: geschichtliche Rückblicke auf drei Jahrhunderte; zum 29. Oktober 1904 / von Arend Buchholtz. Berlin: 1904.

## Vom Nachrichten- zum Intelligenzblatt

War die Unterdrückung und Drangsalierung politisch akzentuierter Zeitungen unter dem Soldatenkönig zum System geworden, so war sein Sohn und Nachfolger Friedrich II. geneigt, die Zügel etwas lockerer zu halten.<sup>6</sup> Berühmt sind Zitate wie: „... zu schreiben was er will, ohne daß solches censiret werden soll ...“ und die Überlieferung des Ministers Podewil: „Sr. Königl. Mayestät erwiederten aber, daß Gazetten wenn sie interessant seyn sollten, nicht genieret werden müßten.“ Diesem guten Vorsatz des jungen Königs von 1740 lief dann jedoch die Praxis verschärfter Zensurbestimmungen während des Siebenjährigen Krieges entgegen. Mit dem Regierungsantritt Friedrich II. wurde das alleinige Privileg der *Vossischen* mit dem weiteren für die *Berlinischen Nachrichten von Staats- und gelehrten Sachen* seines Buchhändlerfreundes Ambrosius Haude beendet – das konkurrierende Blatt, die spätere *Spenersche Zeitung*, bestand allerdings nur bis 1874, und auch das vielversprechende Motto in der Kartusche der Erstausgaben: „Wahrheit und Freyheit“ blieb ein hehrer, so nicht erfüllter Wunsch.

Noch zu Rüdigers Zeiten kam 1748 Gotthold Ephraim Lessing nach Berlin, arbeitete erst in Rüdigers Zeitungsverlag, übernahm noch unter Christian Friedrich Voß ab 1751 die Redaktion der „Gelehrten Artikel“ und erweiterte dann die Zeitung um die monatlich erscheinende Beilage: „Das Neueste aus dem Reiche des Witzes“, gewidmet den gelehrten Aktualitäten, „welche diejenigen Künste und Wissenschaften betreffen, die bei den meisten mehr zum Vergnügen als zur Beschäftigung dienen.“ In den wenigen Jahren seiner Redaktionstätigkeit wandelte Lessing das bisherige reine Nachrichtenblatt in eine Zeitung mit geistiger Grundhaltung und kulturpolitischem Willen. Lessings Bruder Karl Gotthelf war mit Vossens Tochter verheiratet und so kam die Familie Lessing in den Besitz der *Vossischen Zeitung* bis zu deren Verkauf an den Ullstein-Verlag im Jahr 1914 – ohne dass sich dies je in der Titelei ausgedrückt hätte. Hier stand bis 1913: „Im Verlage Vossischer Erben“ und es war ja auch der Familienbesitz, der auf Vossens Tochter Marie-Friederike zurückging.

Als erste Berliner Zeitung erschienen die nur recht kurz existierenden, von Heinrich von Kleist edierten *Berliner Abendblätter* von Oktober 1810 bis März 1811 täglich. Die *Vossische Zeitung* zog erst 1824 nach: ab diesem Zeitpunkt erschien die Zeitung täglich, mit Ausnahme des Sonntags, ab 1879 zweimal täglich, als Morgen- und Abendausgabe.

## Zwischen Revolution und Reaktion

Scharf begrenzten zu Beginn des 19. Jahrhunderts die Zensurgesetze und -praktiken die Entwicklung des Berliner Zeitungswesens und die Zensur zwang die Blätter, vornehmlich Trivialitäten zu drucken. Dies wandelte sich weder nach Napoleons Niederlage 1813

<sup>6</sup> Oschilewski, Walther G.: Zeitungen in Berlin. Berlin, (1975), S. 26.

und den Stein-Hardenbergschen Reformen noch nach dem erhofften Regierungsantritt Friedrich Wilhelm IV. 1840. Im Jahr 1843 forderte die *Vossische Zeitung* mit Willibald Alexis als Wortführer „Meinungsfreiheit, Konstitutionalismus und Öffentlichkeit der Gemeindekollegien“<sup>7</sup>. Doch erst die Märzrevolution 1848 brachte die Dogmen des Absolutismus zum Wanken. Die Zensur wurde aufgehoben und Friedrich Wilhelm IV. erließ in einer Amnestie die „Vergebung allen denen die wegen politischer- oder durch die Presse verübten Vergehen u. Verbrechen angeklagt oder verurtheilt worden sind“.

Schwankend und zwiespältig blieb die Haltung der *Vossischen Zeitung* während dieser Zeit: einerseits plädierte sie für Demokratie, andererseits war sie auch Sprachrohr eines wankelmütigen Bürgertums, dem „Ruhe und Ordnung“ oberstes Gesetz blieb. Von den zahlreichen Pressegründungen dieser Zeit (1848/49: 45 Tageszeitungen und Wochenblätter) überdauerten nur wenige, wie die politisch-satirische Wochenschrift *Kladderadatsch* vom 8. Mai 1848 bis September 1944 oder die *Nationalzeitung* vom 1. April 1848 bis 30. September 1938 und die konservative *Neue Preußische Zeitung* (*Kreuz-Zeitung*) vom 16. Juli 1848 bis Januar 1939. Nachdem im November 1848 General Wrangel sowohl den Belagerungszustand über Berlin verkündete, wie auch acht Zeitungen „suspendierte“, also verbot, ging die Vossische Zeitung unruhlich ins Regierungslager über und machte gleich der Kreuz-Zeitung gemeinsame Sache mit der Polizei im Kampf gegen die „verruhten Demokraten“. Erst im nunmehr gemeinsamen Auftreten mit den seitherigen Zeitungs-Neugründungen gegen die von Bismarck 1863 erlassene Presseverordnung, der Protesterklärung, die auf die Verfassung und den Schutz des Eigentums verwies, stellte sich die *Vossische Zeitung* wieder in die Reihen demokratischer Kräfte und begab sich in eine gewisse Distanz zur Bismarck'schen Regierung.

## Im Zeitalter der Massenmedien

Als, wie wir wissen: irrtümlicherweise, am 29. Oktober 1904 die „Tante Voss“ ihren zweihundertsten Geburtstag feierte, stand an ihrer Spitze noch immer der 77-jährige Carl Robert Lessing. Von außen war ihr Bestand unerschüttelt, sie war das Blatt des guten, soliden Bürgertums liberaler Haltung.<sup>8</sup> Doch während eine Vielzahl von hervorragenden Mitarbeitern die Redaktion und die weltweite Bedeutung des Blattes sicherten, waren Verlag und Herstellung längst nicht mehr konkurrenzfähig gegenüber den neuen und schnell aufsteigenden Konkurrenten der Zeitungs-Häuser Ullstein, Mosse, und Scherl. Dennoch war es eine einmalige Besonderheit, eine Zeitung dieser Bedeutung über zweihundert Jahre als Familienunternehmen geführt zu haben.

1914 erfolgte der Verkauf der Zeitung an den Ullstein-Verlag. Wie tiefgreifend der Besitzerwechsel vom Familienunternehmen der „Vossischen Erben“ zu dem vergleichsweise jungen, aber äußerst potenten Ullstein-Verlag war, so war er doch auch

<sup>7</sup> Mendelssohn, Peter de: *Zeitungsstadt Berlin*. Berlin, 1960, S. 50.

<sup>8</sup> Mendelssohn, Peter de: *Zeitungsstadt Berlin*. Berlin, 1960, S. 162.

ein Ausdruck der tiefgreifenden Wandlungen im Pressewesen, der nun – endlich – auch die *Vossische Zeitung* einbezog. Ausführlich schildert dies Max Osborn: „... dass die Epoche der geruchsamten ... Zeitungsform alten Stiles endgültig vorüber war, ... dass die moderne Gestaltung des öffentlichen Lebens ... unerbittlich neue Formungen der Tagespublizistik verlangte.“<sup>9</sup> Auch die gesamte Redaktion der *Vossischen*, vom Chefredakteur Hermann Bachmann und dem Leitartikler Dr. J. Levy bis zum Redaktionssekretär R. Weber, wechselte mit zum neuen Verlag. Dies vorzüglich organisiert und geleitet von Georg Bernhard, der bereits seit 1908 als Verlagsdirektor bei Ullstein tätig war und bis 1920 an der Seite Bachmanns die Abteilung Tageszeitungen im Verlag leitete. Obwohl konservativ und anfänglich kritisch der Einführung des westlichen Parlamentarismus gegenüberstehend, entwickelte sich Bernhard zu einem vehementen Verteidiger der Weimarer Republik. Hatte schon im Januar 1919 die gesamte reichsdeutsche Presse einer Anregung der Redaktion der *Vossischen Zeitung* folgend, sich dafür eingesetzt, dass die Nationalversammlung das Selbstbestimmungsrecht der Völker wahre und die Umsetzung des von der Deutschösterreichischen Nationalversammlung ausgesprochenen Anschlusses Deutschösterreichs an Deutschland anerkenne, so setzte sich die *Vossische Zeitung* unter Bernhards Chefredaktion ab 1920 konsequent und verstärkt für eine Annäherung und Aussöhnung mit Frankreich ein und warf die Frage auf, ob beide Völker nicht mit dem Versuch des Zusammenwirkens zum Wohle, ja zur Rettung des halbzerstörten Weltteils beitragen könnten. Auch zum Völkerbund nahm die *Vossische* eine konstruktive Haltung ein, wie Bernhard es formulierte: „Der Völkerbund ist keine ideale Forderung, sondern eine Form der Politik.“<sup>10</sup>

### Letzte Blüte in der Weimarer Zeit

Georg Bernhard kam bereits 1898 als Handelsredakteur der *Berliner Morgenpost* zum Ullstein-Verlag. Nachdem er ab 1909 als Verlagsredakteur schon wie ein „Chefredakteur der Chefredakteure“ fungierte wurde er schließlich 1920 der alleinige Chefredakteur der *Vossischen Zeitung*. In den zehn Jahren, die Bernhard an dieser Stelle im Ullstein-Verlag tätig war, formte er die *Vossische Zeitung* zu einem linksliberalen Blatt, „zu den wenigen Intelligenzblättern des Reiches [...] Die „Voss“ beschrieb das Ende des Ersten Weltkrieges, die Revolution, die Versuche in ganz Deutschland einen Rätestaat zu errichten, und die Anfänge der Weimarer Republik. Sie berichtete über die Auswirkungen des Vertrages von Versailles und über die Weltwirtschaftskrise von 1929 mit ihren verheerenden Folgen für Deutschland. Sie informierte über das allgemeine Misstrauen in die führenden deutschen Politiker und das Erstarken der NSDAP. Aber die „Vossische Zeitung“ war nicht nur ein politisches Blatt. Ihr Wirtschaftsteil genoss überregionales, ja internationales Ansehen. Die kulturellen Entwicklungen, Komplexitäten und Wider-

<sup>9</sup> Osborn, Max: Die Vossische Zeitung seit 1914. In: 50 Jahre Ullstein. Berlin, 1927, S. 224

<sup>10</sup> Osborn, Max: Die Vossische Zeitung seit 1914. In: 50 Jahre Ullstein. Berlin, 1927, S. 264.

sprüchlichkeiten der sogenannten Goldenen Zwanziger Jahre – besonders in Berlin – spiegeln sich nirgendwo so plastisch wie in dieser Zeitung.<sup>11</sup>

In den 20er Jahren fand Bernhard hervorragende Mitstreiter, die eine hochqualifizierte Redaktion bildeten, welche in Deutschland ihresgleichen suchte. Es ist hier unmöglich, eine annähernd vollständige Übersicht der prominenten Redakteure und Mitarbeiter zu liefern – da sei für Interessierte auf das Literaturverzeichnis verwiesen. War doch schon im 19. Jahrhundert Theodor Fontane fast 20 Jahre der Theaterkritiker der Vossischen und veröffentlichte dort 1887 „Irrungen und Wirrungen“. In den zwanziger Jahren des 20. Jahrhunderts wurde diese Tradition fortgesetzt, im Romanteil waren Autoren wie Georg Hermann, Hermann Sudermann, Arthur Schnitzler, Jakob Wassermann, Walther von Hollander, Erich Maria Remarque mit Erstveröffentlichungen vertreten. Beträchtliches Aufsehen erregten damals die in der Voss veröffentlichten Lebenserinnerungen von Maxim Gorki. Einer der brilliantesten Mitarbeiter der *Vossischen Zeitung* seit 1924 war Kurt Tucholsky.

Der Chefredakteur Georg Bernhard schied nach dem „Bruderzwist im Hause Ullstein“ bereits 1930 aus dem Verlag aus und emigrierte 1933 nach Paris, wo er das linksdemokratische *Pariser Tageblatt* mitgründete und herausgab. Die *Vossische Zeitung* verlor nach der Machtübernahme der Nationalsozialisten viele ihrer Mitarbeiter. An die Stelle von J. Elbau, der Bernhard im Amt des Chefredakteurs gefolgt war, trat Erich Welter von der alten *Frankfurter Zeitung*, an die er 1934 auch wieder zurückkehrte. Später, nach Kriegsende war Welter Mitherausgeber der *Frankfurter Allgemeinen Zeitung*. Die *Vossische Zeitung* war nun für den Ullstein-Verlag ein Verlustgeschäft, welches jährlich zwei Millionen Mark Zuschuß erforderte. So entschloss sich der Verlag, die älteste Zeitung Berlins aufzugeben. Moritz Goldstein (Pseudonym Inquit, Gerichtsreporter in der Nachfolge von Paul Schlesinger alias SLING) brachte das Gefühl vieler auf den Punkt: „Wir alle, die wir uns um die ‚Vossische Zeitung‘ bemühten, zusammen mit ihren Lesern, bildeten einen Gesinnungsbund, wir fühlten uns im Dienst einer Idee und wirkten für sie mit Enthusiasmus, den nur die Idee auslöst. Es war mir völlig aus der Seele gesprochen, was mein armer junger Kollege, Heinrich Mühsam [...] mir [...] schrieb, als unser Blatt sein Erscheinen hatte einstellen müssen: ‚Jetzt erst sind wir heimatlos.‘“<sup>12</sup>

Berlin, Januar 2010

Joachim Zeller

<sup>11</sup> Ernst Cramer, *Die Welt*, 30. März 2009.

<sup>12</sup> Moritz Goldstein: *Vom Leben und Sterben der Vossischen Zeitung*. In: *Hundert Jahre Ullstein*, S. 141.

## Literatur

- Consentius, Ernst: Die älteste Berliner Zeitung : Fragmente der Berliner Wochenzeitung von 1626 aus dem Besitz der Preußischen Staatsbibliothek. Berlin : Preußische Staatsbibliothek, 1928. [12] Bl., 21 S. : Ill.
- Oschilewski, Walther G.: Zeitungen in Berlin ; Im Spiegel der Jahrhunderte. (Mit 66 Abb.) Berlin: Haude & Spener, (1975), 326 S.
- Osborn, Max [Hrsg.]: 50 Jahre Ullstein : 1877–1927. darin: Max Osborn: Die Vossische Zeitung seit 1914. Berlin : Ullstein, 1927, 411 S. : Ill.
- Lindner, Erik [Red.]: Presse- und Verlagsgeschichte im Zeichen der Eule : 125 Jahre Ullstein <Berlin>. Berlin : Axel-Springer-Verlag, 2002, 161 S. : zahlr. Ill. ; 30 cm
- Klein, Michael: Georg Bernhard : die politische Haltung des Chefredakteurs der „Vossischen Zeitung“ 1918–1930. Frankfurt am Main [u.a.] : Lang, 1999, XIV, 273 S.
- Mendelssohn, Peter de: Zeitungsstadt Berlin : Menschen und Mächte in der Geschichte der deutschen Presse. Berlin : Ullstein, 1960 521 S. : Ill. + 12 Faks.-Beil., davon 4 lose
- Buchholtz, Arend: Die Vossische Zeitung : geschichtliche Rückblicke auf drei Jahrhunderte; zum 29. Oktober 1904. Berlin : Reichsdr., 1904. II, 355 S., [11] Bl. : zahlr. Ill. Anmerkung: Teilw. in Rot- und Schwarzdr. / Nebent.: Berlinische privilegierte Zeitung, 1704–1904 / In Fraktur
- Hundert Jahre Ullstein : 1877–1977; Hrsg.: W. Joachim Freyburg u. Hans Wallenberg. Berlin [u.a.] : Ullstein, 1977, 387 S. : Ill. ; 8°
